# Supplementary material for: Protection Activity of 1,4-Naphthoquinones in Rotenone-Induced Models of Neurotoxicity
Source: MDPI journal article supplement (doi:10.3390/md22020062), 2024-01-25
Supplement: s1 [file s1]

## **Protection activity of 1,4-naphthoquinones in rotenone-induced models of neurotoxicity.**

**Irina Agafonova<sup>1§</sup>, Ekaterina Chingizova<sup>1§</sup>, Elena Chaikina<sup>1</sup>, Ekaterina Menchinskaya<sup>1</sup>, Sergey Kozlovskiy<sup>1</sup>, Galina Likhatskaya<sup>1</sup>, Yuri Sabutski<sup>1</sup>, Sergey Polonik<sup>1</sup>, Dmitry Aminin<sup>1,2</sup> and Evgeny Pislyagin<sup>1\*</sup>**

<sup>1</sup> G.B. Elyakov Pacific Institute of Bioorganic Chemistry, Far-Eastern Branch of the Russian Academy of Science, 690022 Vladivostok, Russia

<sup>2</sup> Department of Biomedical Science and Environmental Biology, Kaohsiung Medical University, No. 100, Shichuan 1st Road, Sanmin District, Kaohsiung City 80708, Taiwan

<sup>§</sup> Equal contribution

\* Correspondence: [pislyagin@hotmail.com](mailto:pislyagin@hotmail.com) (EP); Tel.: +7(4232)319932

### Table of Contents

**Figure S1.** <sup>1</sup>H and <sup>13</sup>C NMR spectra of compound **4** (U-573)

**Figure S2.** <sup>1</sup>H and <sup>13</sup>C NMR spectra of compound **8** (U-443)

**Figure S3.** HPLC chromatogram of compound **4** (U-573)

**Figure S4.** HPLC chromatogram of compound **8** (U-443)

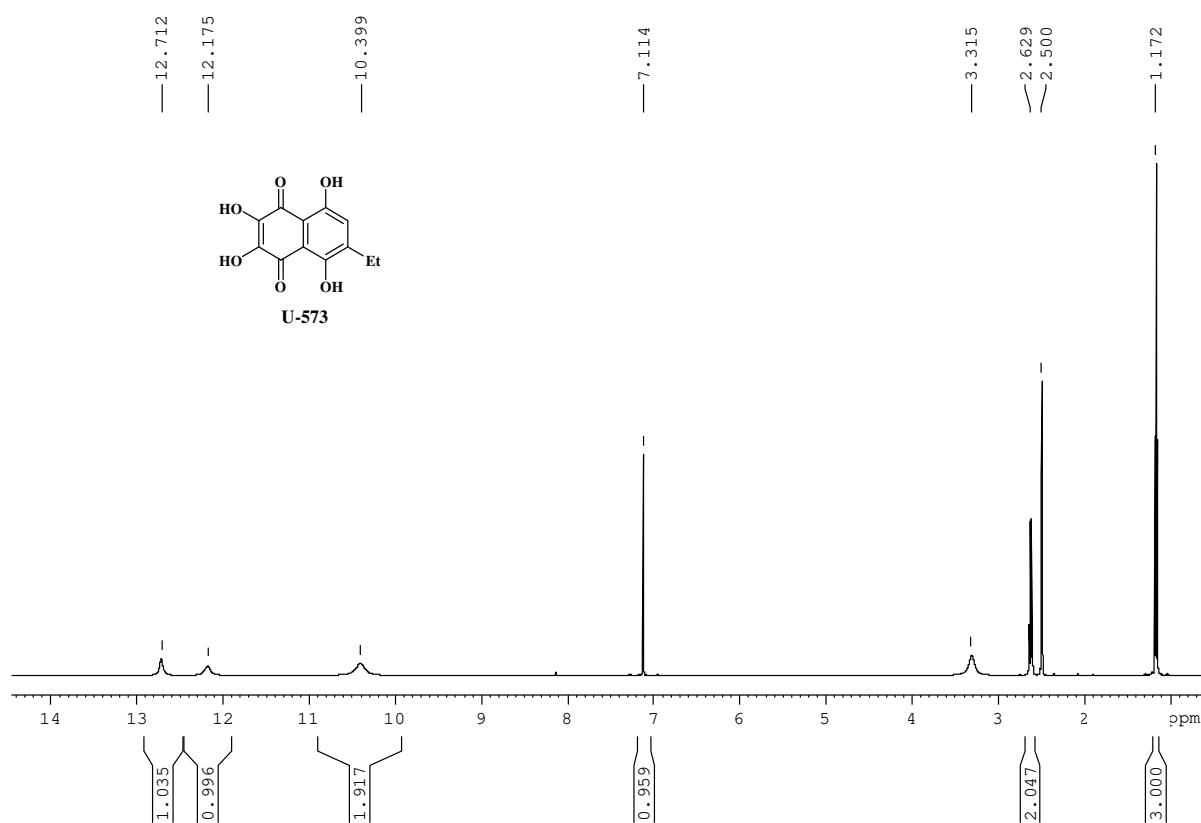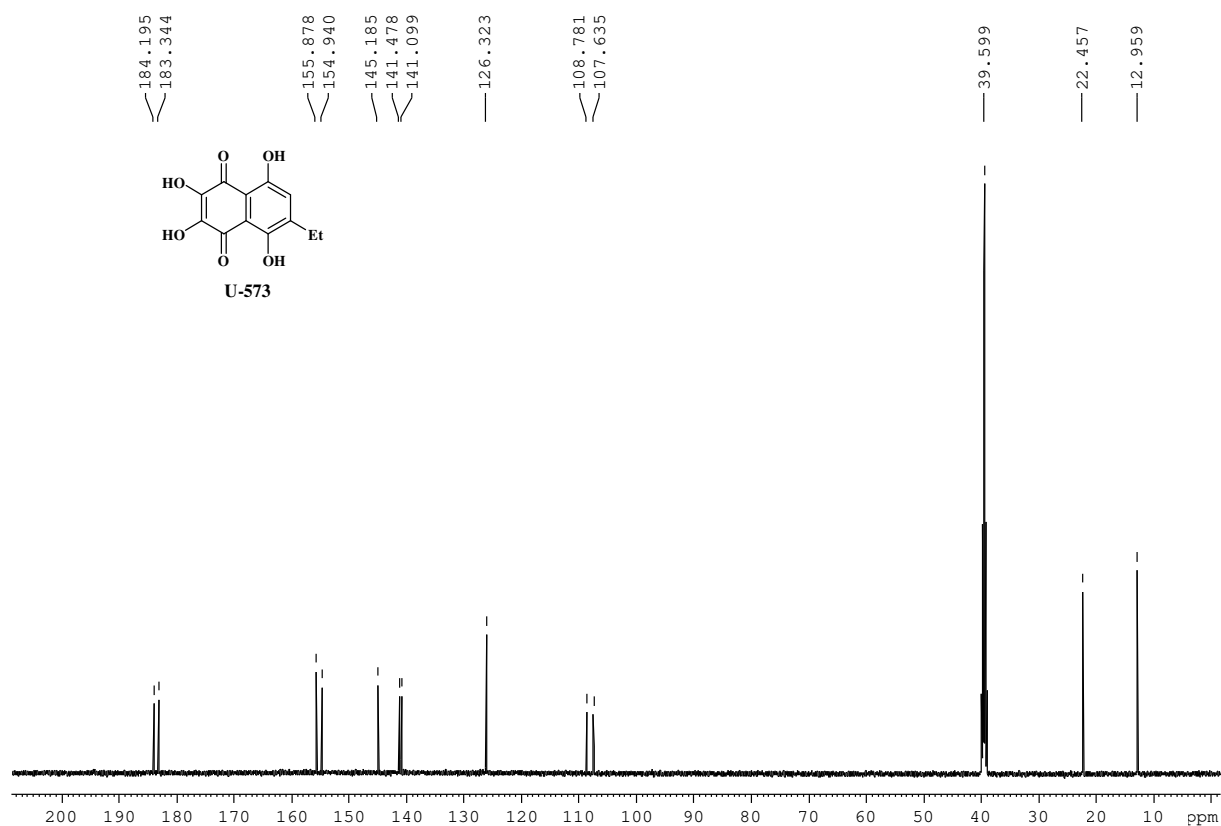

**Figure S1.** <sup>1</sup>H and <sup>13</sup>C NMR spectra of compound 4 (U-573) (solvent - DMSO-d<sub>6</sub>)

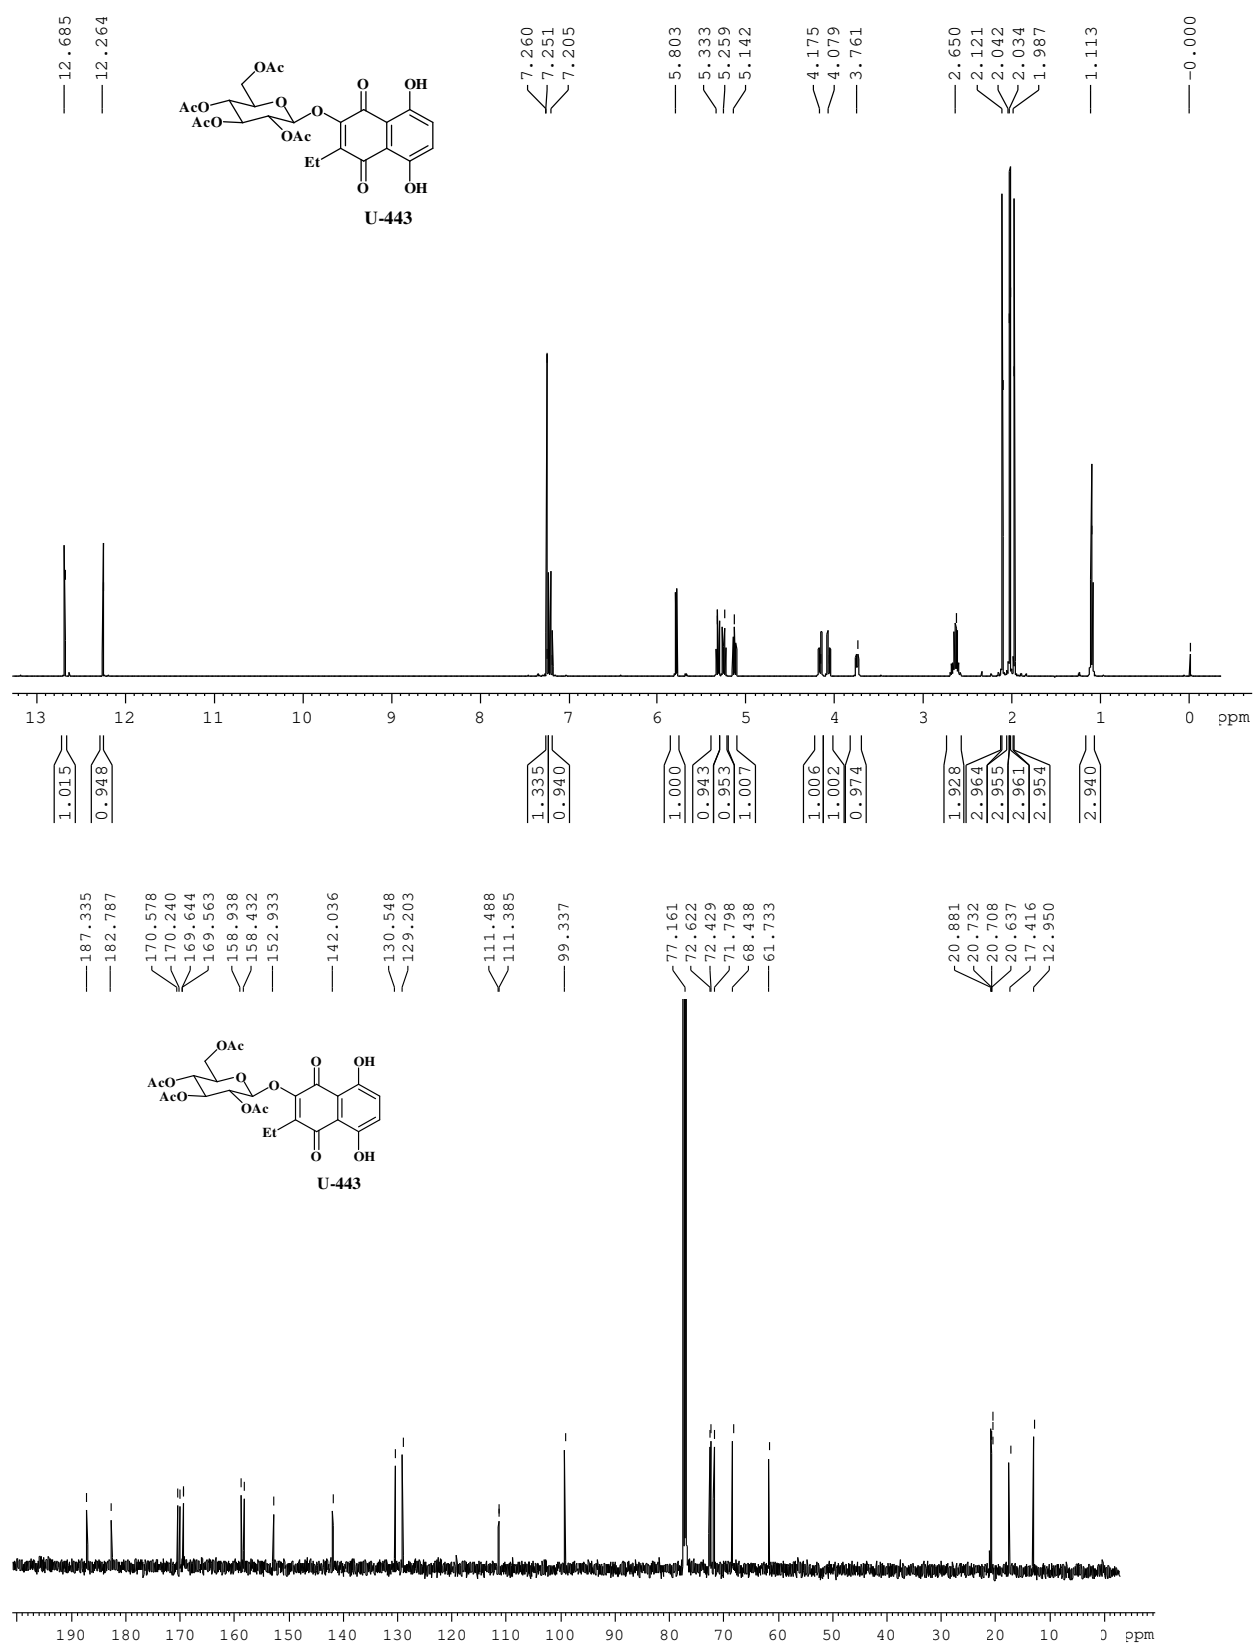

Figure S2. <sup>1</sup>H and <sup>13</sup>C NMR spectra of compound 8 (U-443) (solvent – CDCl<sub>3</sub>)

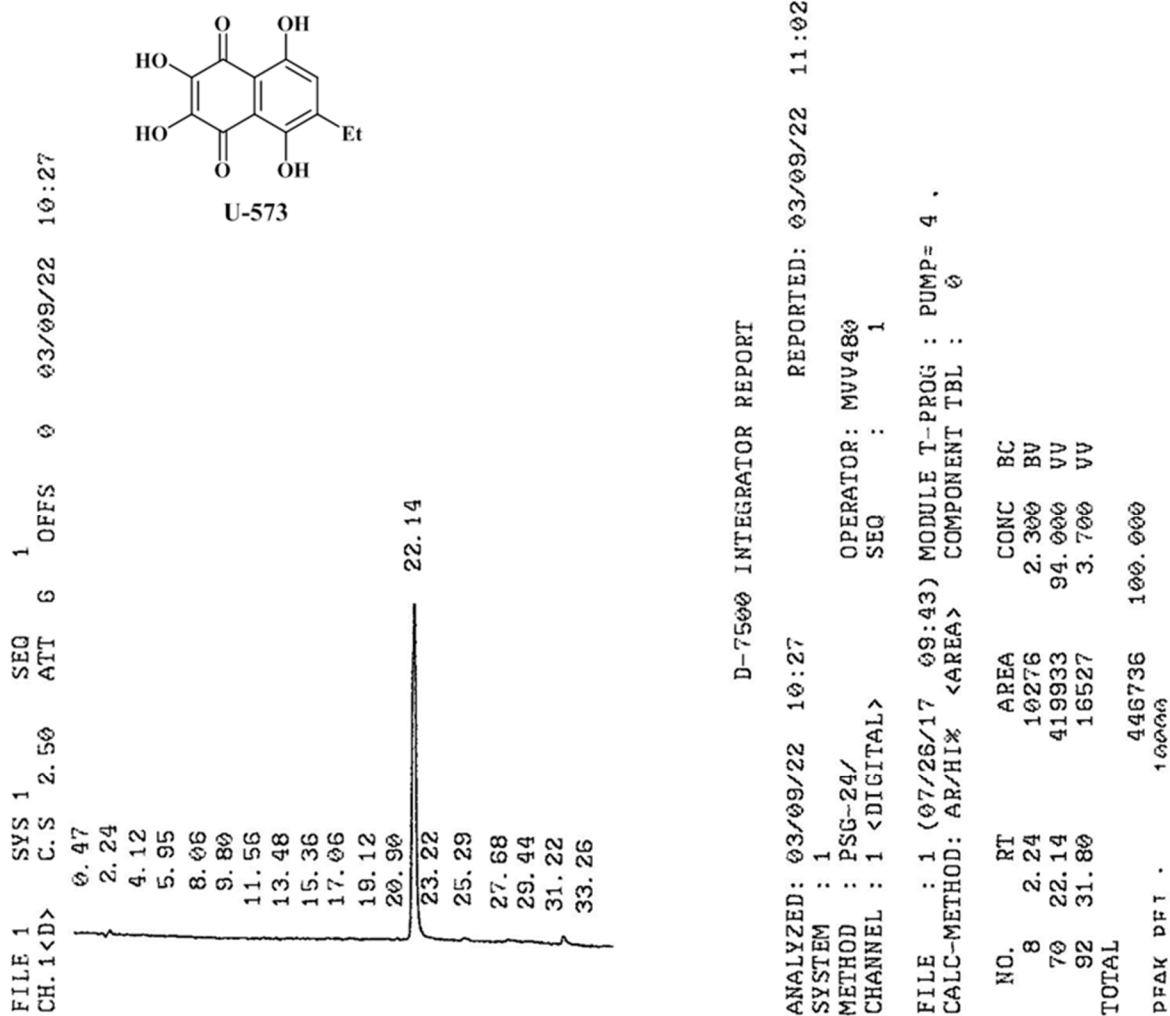

Figure S3. HPLC chromatogram of compound 4 (U-573)

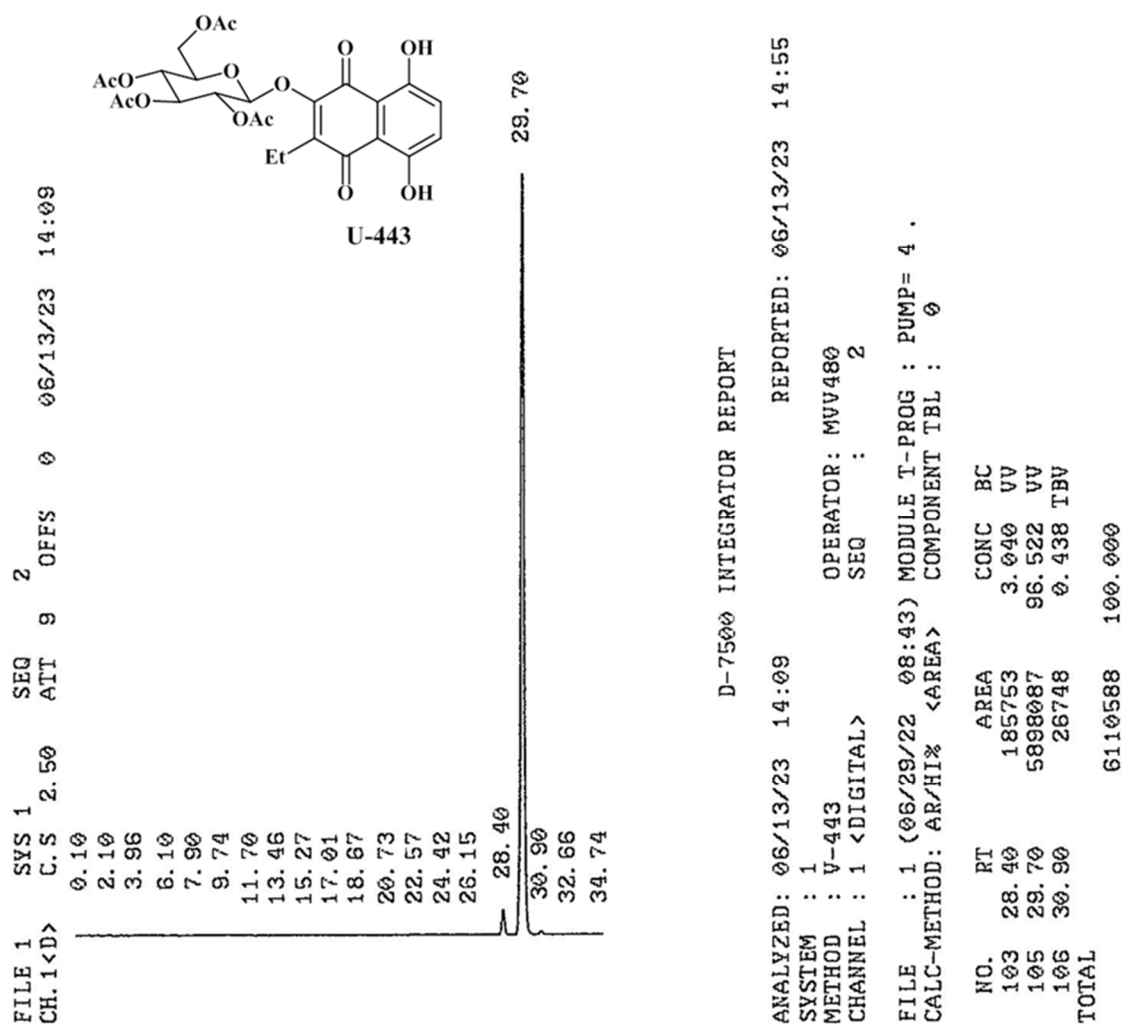

**Figure S4.** HPLC chromatogram of compound 8 (U-443)
